# Supplementary material for: β-Arrestin Interacts with the Beta/Gamma Subunits of Trimeric G-Proteins and Dishevelled in the Wnt/Ca2+ Pathway in Xenopus Gastrulation
Source: PLoS One. 2014 Jan 29;9(1):e87132. doi: 10.1371/journal.pone.0087132 (PMC3906129; doi:10.1371/journal.pone.0087132)
Supplement: Figure S1 — Alignment of arrb2 and arrb1 sequences. Alignment of the novel sequence stretch of the arrb2 5′UTR including the first 132 nucleotides of arrb2 coding sequence to the corresponding sequences of arrb2 mRNA (NCBI NM_001092112) and arrb1 mRNA (NCBI NM_001094402) generated with ClustalW2. Asterisks indicate nucleotides conserved in all three sequences; morpholino binding regions are highlighted in light grey, the start codon is shown as bold and underlined. (PDF) [file pone.0087132.s001.pdf]

### Figure S1

|                           |                                                                                           |     |
|---------------------------|-------------------------------------------------------------------------------------------|-----|
| <i>arrb2</i> 5'UTR+CDS    | -----GGCTTCTCTACTGTGCGTTTTGGAAACCGTGCGCGACTCCGCGGAGGTGGGAT                                | 50  |
| NM_001092112 <i>arrb2</i> | -----                                                                                     |     |
| NM_001094402 <i>arrb1</i> | AGCAGCAGCAGCACATTAATCCCGTCCCTCTCTCCCTAATCTCCCCGGGATCTGCACAAAAGCACTCGCTCTCTCGACCCCTGGCAC   | 90  |
| <i>arrb2</i> 5'UTR+CDS    | TGGAGCGCGTGAACCCAGAGCAAGCGGAGGAGCTG-----GGAAGATGCGGGGAGAGGGCGGGGACCCGGGTTTTC AAGAAATCCAGC | 132 |
| NM_001092112 <i>arrb2</i> | -----GAGGAGGAGCTG-----GGAAGATGCGGGGAGAGGGCGGGGACCCGGGTTTTC AAGAAATCCAGC                   | 59  |
| NM_001094402 <i>arrb1</i> | TCCTGCACCTCTGCCTGTCTCTCTGCACCTCTGCCCTCCTGCATGATGCGGGGACAAAG--GAACCAGAGTATTTAAGAAGGCGAGT   | 177 |
|                           | * * * * *                                                                                 |     |
| <i>arrb2</i> 5'UTR+CDS    | CCTAACTGCAAGCTCACCGTGACCTTGGAAGCGAGATTTTGTGCATCACCTGGATCGGGTTGATCCTGTGGATGGCGTCGTCCTTGTG  | 222 |
| NM_001092112 <i>arrb2</i> | CCTAACTGCAAGCTCACCGTGACCTTGGAAGCGAGATTTTGTGCATCACCTGGATCGGGTTGATCCTGTGGATGGCGTCGTCCTTGTG  | 149 |
| NM_001094402 <i>arrb1</i> | CCAAATGGAAGCTGACTGTTTACTTGGGCAAGAGGAGCTTTGTTGATCACGTAGACGTGGTGGATCCTGTGGATGGGGTGGTGTGGTG  | 267 |
|                           | * * * * *                                                                                 |     |
