# Supplementary material for: β-Arrestin Interacts with the Beta/Gamma Subunits of Trimeric G-Proteins and Dishevelled in the Wnt/Ca2+ Pathway in Xenopus Gastrulation
Source: PubMed Central journal article supplement (PMC3906129; doi:10.1371/journal.pone.0087132), 2014-01-29

# Figure S2

**A**

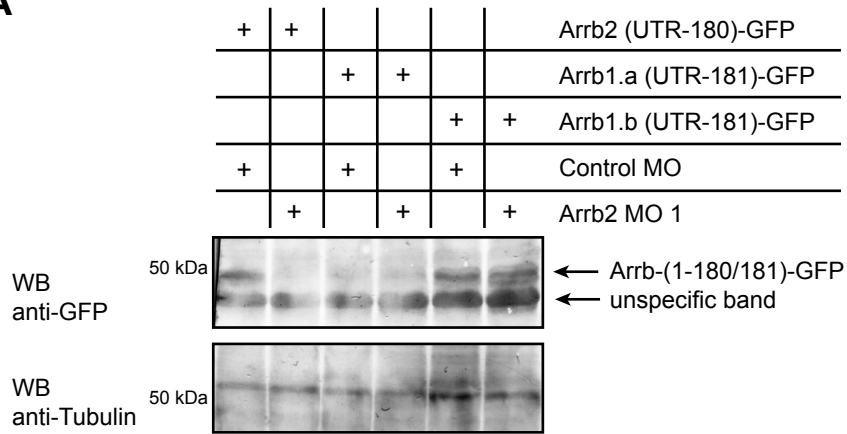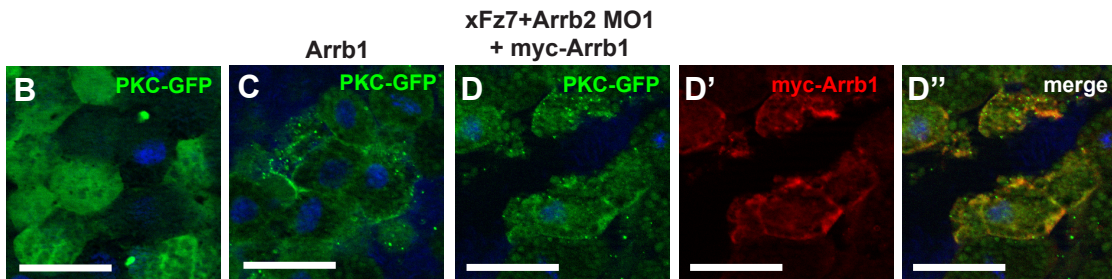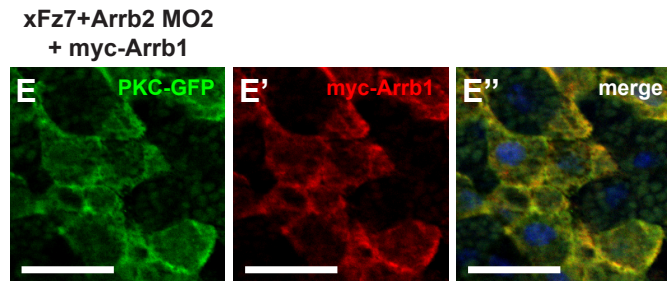

Supplement: pone.0087132.s002.pdf [file pone.0087132.s002.pdf]
