# Supplementary material for: β-Arrestin Interacts with the Beta/Gamma Subunits of Trimeric G-Proteins and Dishevelled in the Wnt/Ca2+ Pathway in Xenopus Gastrulation
Source: PubMed Central journal article supplement (PMC3906129; doi:10.1371/journal.pone.0087132), 2014-01-29
Supplement: pone.0087132.s004.pdf [file pone.0087132.s004.pdf]

**Table S1**

|               | forward Primer          | reverse Primer          |
|---------------|-------------------------|-------------------------|
| <i>arb1_1</i> | tgaaagctgactgttactgg    | atctcaaaggtgaatggataggc |
| <i>arb2_1</i> | ctgacaggtctctgcacctagaa | caaaggtcgtgagatgttctctg |
| <i>odc_1</i>  | gatgggctggatcgatcgt     | tggcagcagtacagacagca    |
| <i>arb1_2</i> | aggaattcagtcgtttgtaat   | caaatacagcatactggcgaac  |
| <i>arb2_2</i> | ctatgaaattcgtgccttctgtg | attgcctctccgtgtaatagag  |
| <i>odc_2</i>  | cattgcagagcctgggagata   | tccacttgctcattcaccataac |
